# Supplementary material for: Use-dependent potentiation of voltage-gated calcium channels rescues neurotransmission in nerve terminals intoxicated by botulinum neurotoxin serotype A
Source: PubMed Central journal article supplement (PMC5696531; doi:10.1038/s41598-017-16064-3), 2017-11-20

# Use-dependent potentiation of voltage-gated calcium channels rescues neurotransmission in nerve terminals intoxicated by botulinum neurotoxin serotype A

Phillip H. Beske\*, Katie M. Hoffman\*, James B. Machamer, Margaret R. Eisen, and Patrick M. McNutt

From the Department of Neuroscience, U.S. Army Medical Research Institute of Chemical Defense, Gunpowder, MD 21010

**Supplementary Figure S1. 3,4-DAP, GV-58 or FPL 64176 do not alter spontaneous mEPSC characteristics.** (A) Left: Representative whole-cell recordings of spontaneous mEPSCs in non-intoxicated cultures treated with vehicle or 3,4-DAP (50  $\mu$ M). Right: Quantitation of mEPSC frequency (3,4-DAP) and amplitudes (3,4-DAP, GV-58 and FPL 64176). (B) Left: Representative whole-cell recordings of BoNT/A-intoxicated cultures  $\pm$  3,4-DAP. Right: Quantitation of mEPSC frequency (vehicle vs 3,4-DAP). Scale bars represent 5 s (x-axis) and 20 pA (y-axis). Grouped data is presented as mean  $\pm$  SEM. *ns* = not significant.

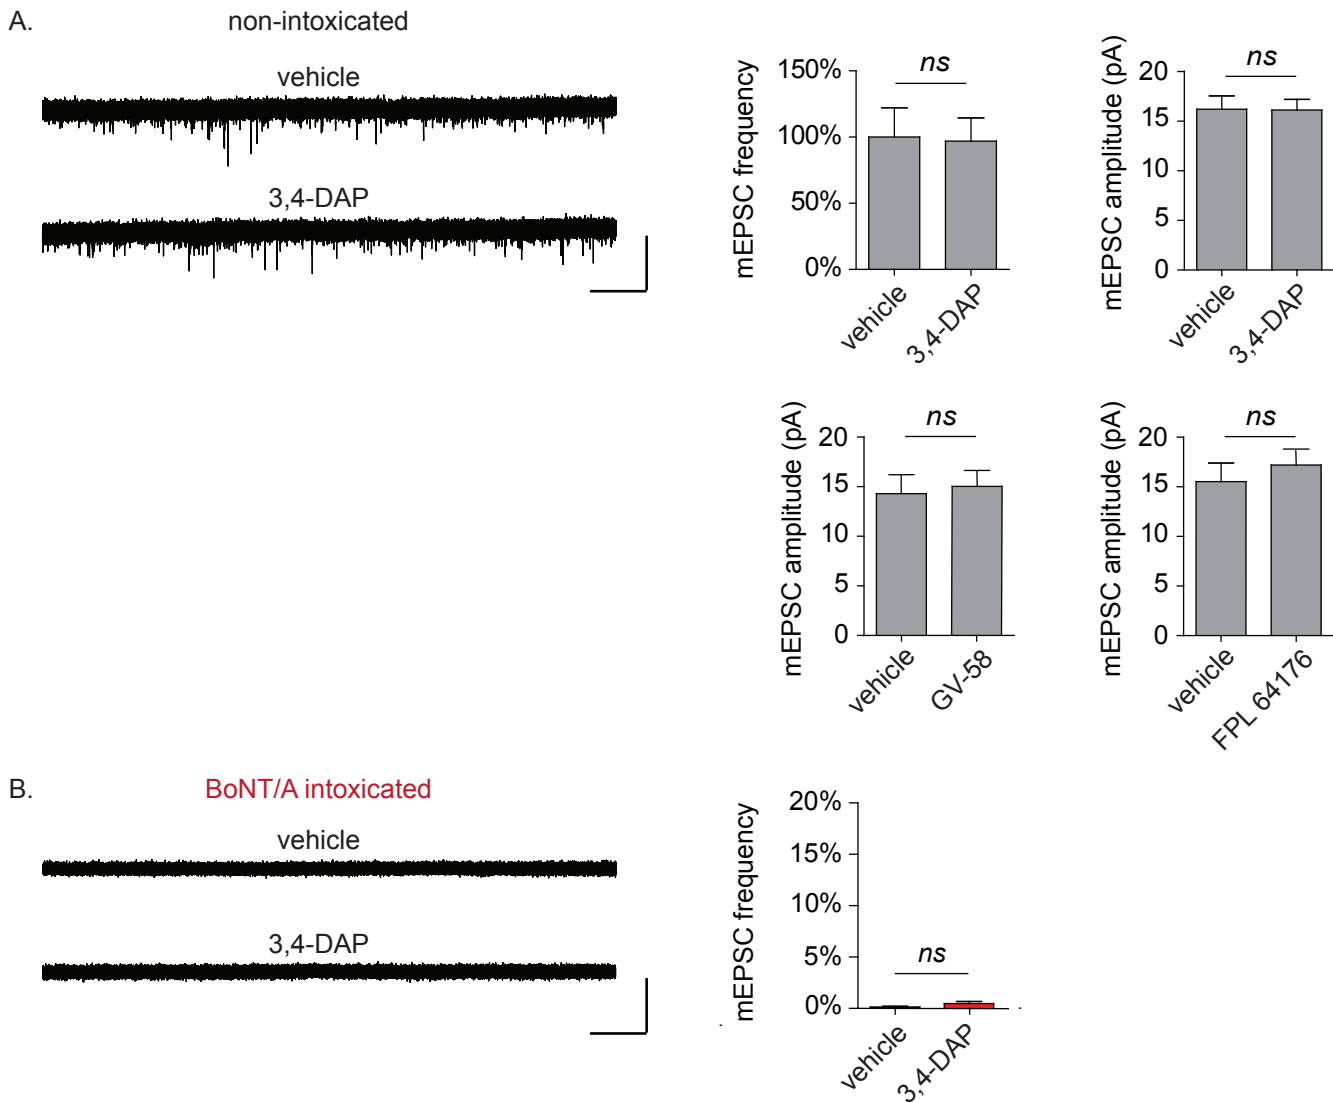

Supplement: 41598_2017_16064_MOESM1_ESM.pdf [file 41598_2017_16064_MOESM1_ESM.pdf]
